# Supplementary material for: Coral geochemical response to uplift in the aftermath of the 2005 Nias–Simeulue earthquake
Source: Sci Rep. 2024 Apr 15;14:8686. doi: 10.1038/s41598-024-57833-1 (PMC11018842; doi:10.1038/s41598-024-57833-1)
Supplement: Supplementary file 1 — Supplementary Information. [file 41598_2024_57833_MOESM1_ESM.pdf]

## Supplementary Information

### Coral geochemical response to uplift in the aftermath of the 2005 Nias-Simeulue earthquake

Sindia M. Sosdian<sup>1,2,\*</sup>, Michael K. Gagan<sup>2,3,4</sup>, Danny H. Natawidjaja<sup>5</sup>, Alena K. Kimbrough<sup>2,3</sup>, Bambang W. Suwargadi<sup>6</sup>, Hamdi Rifai<sup>7</sup>, Heather Scott-Gagan<sup>2</sup>, Dudi Prayudi<sup>6</sup>, Imam Suprihanto<sup>6</sup>, Wahyoe S. Hantoro<sup>3,4,6†</sup>

<sup>1</sup>School of Earth and Ocean Sciences, Cardiff University, Cardiff, CF10 3AT, United Kingdom

<sup>2</sup>Research School of Earth Sciences, The Australian National University, Canberra, ACT 2601, Australia

<sup>3</sup>School of Earth, Atmospheric and Life Sciences, University of Wollongong, Wollongong, NSW 2522, Australia

<sup>4</sup>School of Earth and Environmental Sciences, The University of Queensland, St Lucia, QLD 4072, Australia

<sup>5</sup>Research Center for Geological Disaster, National Research and Innovation Agency (BRIN), Bandung 40135, Indonesia

<sup>6</sup>Research Center for Geotechnology, Indonesian Institute of Sciences (LIPI), Bandung 40135, Indonesia

<sup>7</sup>Department of Physics, Universitas Negeri Padang, Padang 25131, Indonesia

<sup>†</sup>Deceased

\*Corresponding author: [sosdians@cardiff.ac.uk](mailto:sosdians@cardiff.ac.uk)

### Supplementary Figures

**Figure 1:** Underwater photos of *Porites* spp. corals drilled at sites NS09-2.5A, NS09-1.8A and NS09-M0.4A.

**Figure 2:** X-ray positive images for coral drill-cores NS09-1.8A-2, NS09-1.8A-5 and NS09-1.8A-6.

**Figure 3:** Plain light photo, X-ray positive image and Ba/Ca age model for coral drill-core NS09-2.5A-1.

**Figure 4:** Plain light photo, X-ray positive image and Ba/Ca age model for coral drill-core NS09-2.5A-3.

**Figure 5:** X-ray positive image and Ba/Ca age model for coral drill-core NS09-M0.4A-3.

**Figure 6:** LA-ICP-MS Ba/Ca, Mn/Ca and Y/Ca data profiles for drill-cores NS09-2.5A-1 and NS09-2.5A-3.

**Figure 7:** LA-ICP-MS Ba/Ca, Mn/Ca and Y/Ca data profiles for drill-cores NS09-1.8A-2, NS09-1.8A-5 and NS09-1.8A-6.

**Figure 8:** LA-ICP-MS Ba/Ca, Mn/Ca and Y/Ca data profiles for drill-cores NS09-M0.4A-3.

### Supplementary Data

**Table 1:** T-test results for pre- and post-earthquake elemental ratios in the Nias corals.

### Supplementary References

## Supplementary Figures

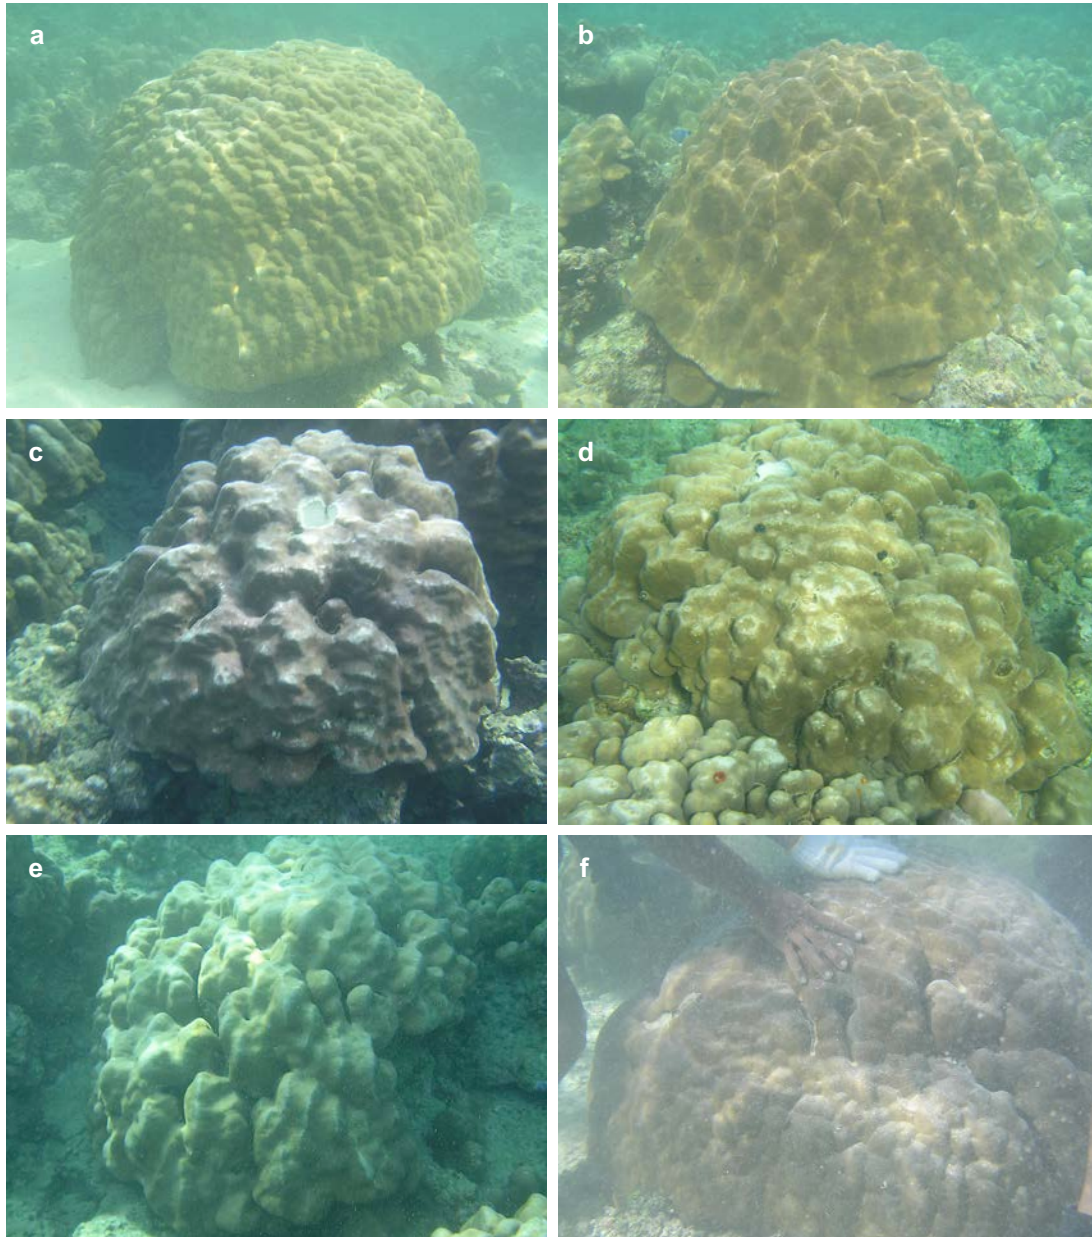

**Figure 1 | Underwater photos of *Porites* spp. corals drilled at sites NS09-2.5A, NS09-1.8A and NS09-M0.4A.** Corals 2.5A-1 (a) and 2.5A-3 (b) drilled on 20 May 2009 in turbid water in the shallow platform reef lagoon created by 2.5 m coseismic uplift west of Lahewa Harbour. Corals 1.8A-2 (c), 1.8A-5 (d) and 1.8A-6 (e) drilled on 24-25 May 2009 along the fringing reef at Hilimakora Island with 1.8 m coseismic uplift. Coral M0.4A-3 (f) drilled on 27 May 2009 on the offshore fringing reef lagoon at Sarangbaung Island with 0.4 m coseismic subsidence.

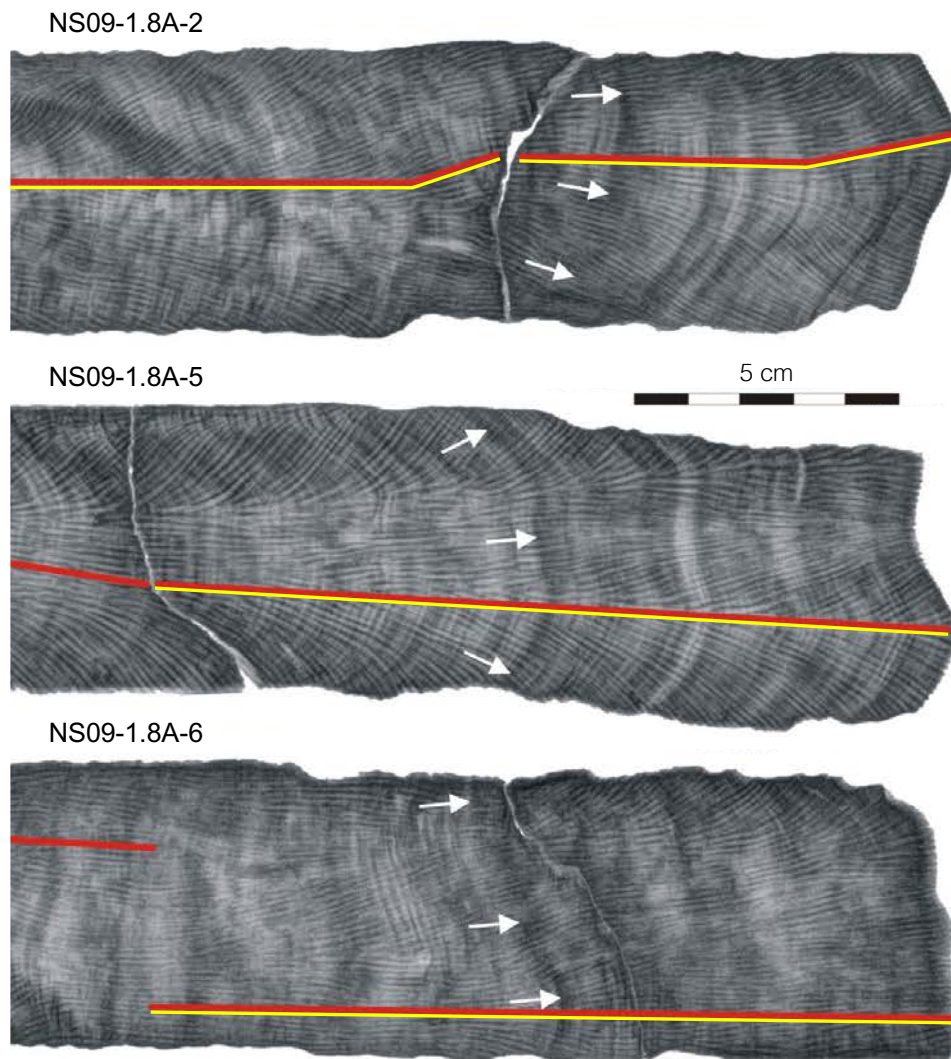

**Figure 2 | X-ray positive images (darker = higher density) for coral drill-cores NS09-1.8A-2, NS09-1.8A-5 and NS09-1.8A-6** (adapted from Gagan et al. 2015). The corals were drilled underwater on the fringing reef at Hilimakora Island that was raised by 1.8 m during the 28 March 2005 earthquake (Briggs et al. 2006). Arrows in each core mark the depth of a slight increase in skeletal density following the earthquake. Red lines show sampling transects used for stable isotope analysis (Gagan et al. 2015). Yellow lines show the ~150-mm lengths of the LA-ICP-MS sampling tracks positioned alongside the stable isotope transects.

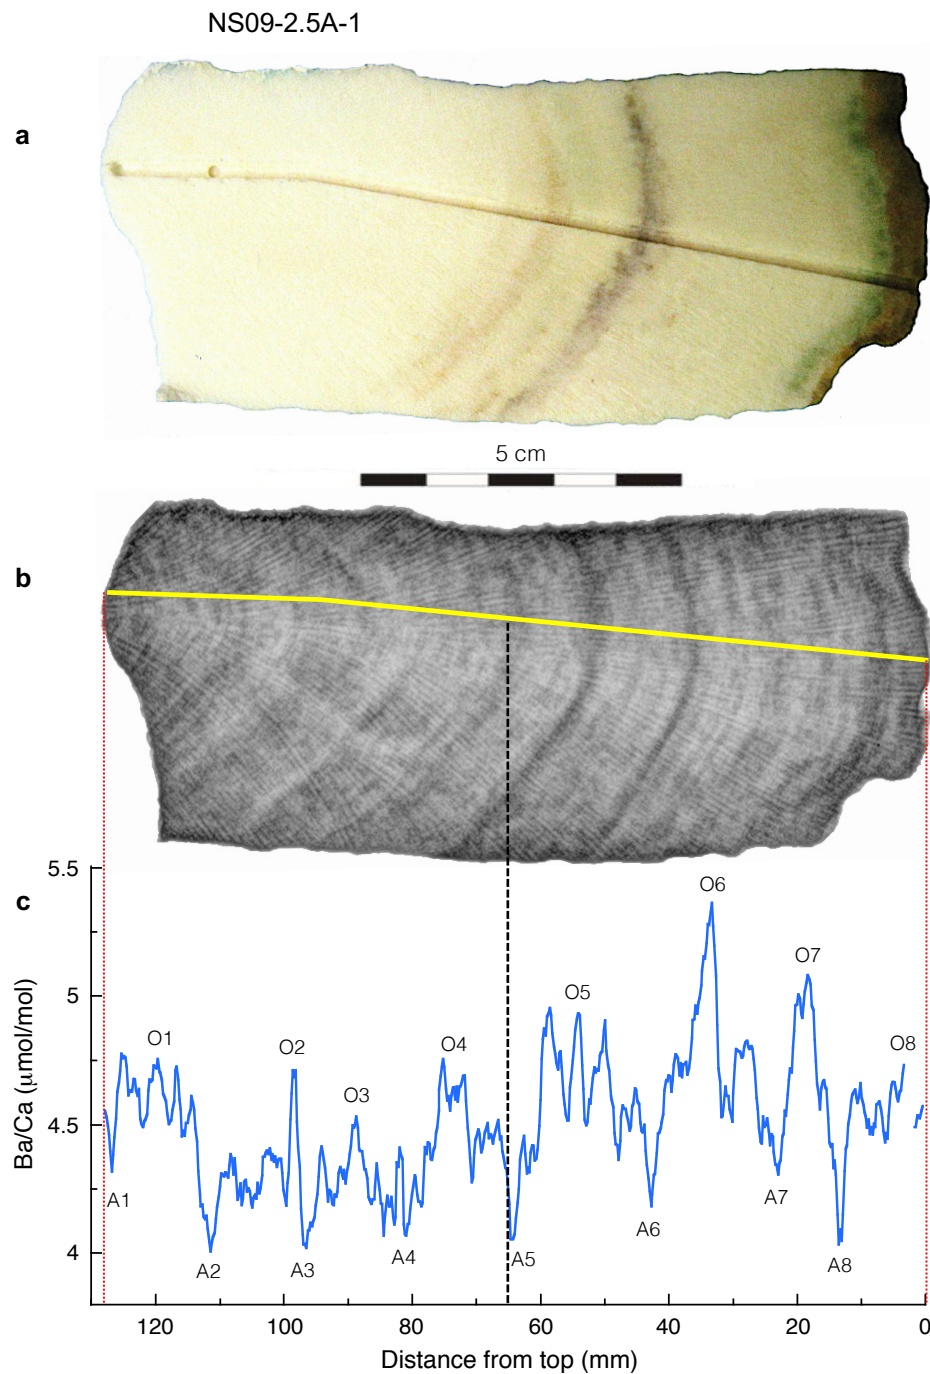

**Figure 3 | Plain light photo, X-ray positive image and Ba/Ca age model for coral drill-core NS09-2.5A-1.** (a) Photo of the coral slab for *Porites* sp. coral 2.5A-1 drilled underwater in the shallow lagoon of the raised reef west of Lahewa Harbour. The coral was raised by 2.5 m during the 28 March 2005 earthquake (Briggs et al. 2006) and shows post-earthquake skeletal discolouration and distinctive green-brown banding. (b) X-ray positive image (darker = higher density) of the coral slab. Yellow line shows the 128-mm length of the LA-ICP-MS sampling track. (c) Seasonal cycles of skeletal Ba/Ca (5-pt running means) used to develop the age model for coral 2.5A-1. The chronology is based on linear interpolation between tie-points assigned to mid-April (low Ba/Ca) and mid-October (high Ba/Ca) (see Methods). Black dashed line marks approximate depth to the March 2005 earthquake.

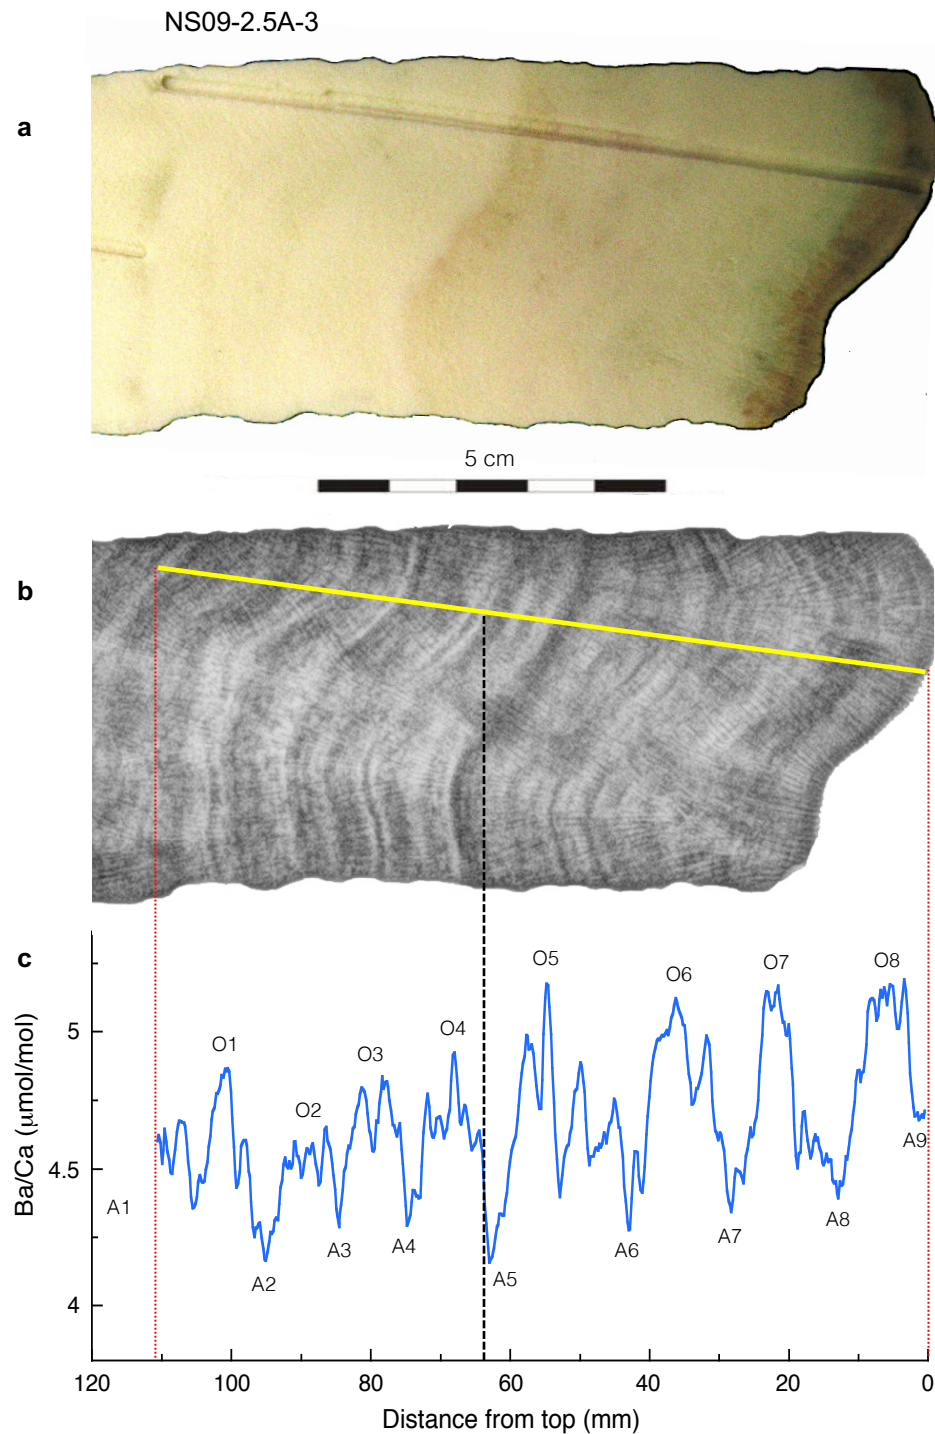

**Figure 4 | Plain light photo, X-ray positive image and Ba/Ca age model for coral drill-core NS09-2.5A-3.** (a) Photo of the coral slab for *Porites* sp. coral 2.5A-3 drilled underwater in the shallow lagoon of the raised reef west of Lahewa Harbour. The coral was raised by 2.5 m during the 28 March 2005 earthquake (Briggs et al. 2006) and shows post-earthquake skeletal discolouration. (b) X-ray positive image (darker = higher density) of the coral slab. Yellow line shows the 111-mm length of the LA-ICP-MS sampling track. (c) Seasonal cycles of skeletal Ba/Ca (5-pt running means) used to develop the age model for coral 2.5A-3. The chronology is based on linear interpolation between tie-points assigned to mid-April (low Ba/Ca) and mid-October (high Ba/Ca) (see Methods). Black dashed line marks approximate depth to the March 2005 earthquake.

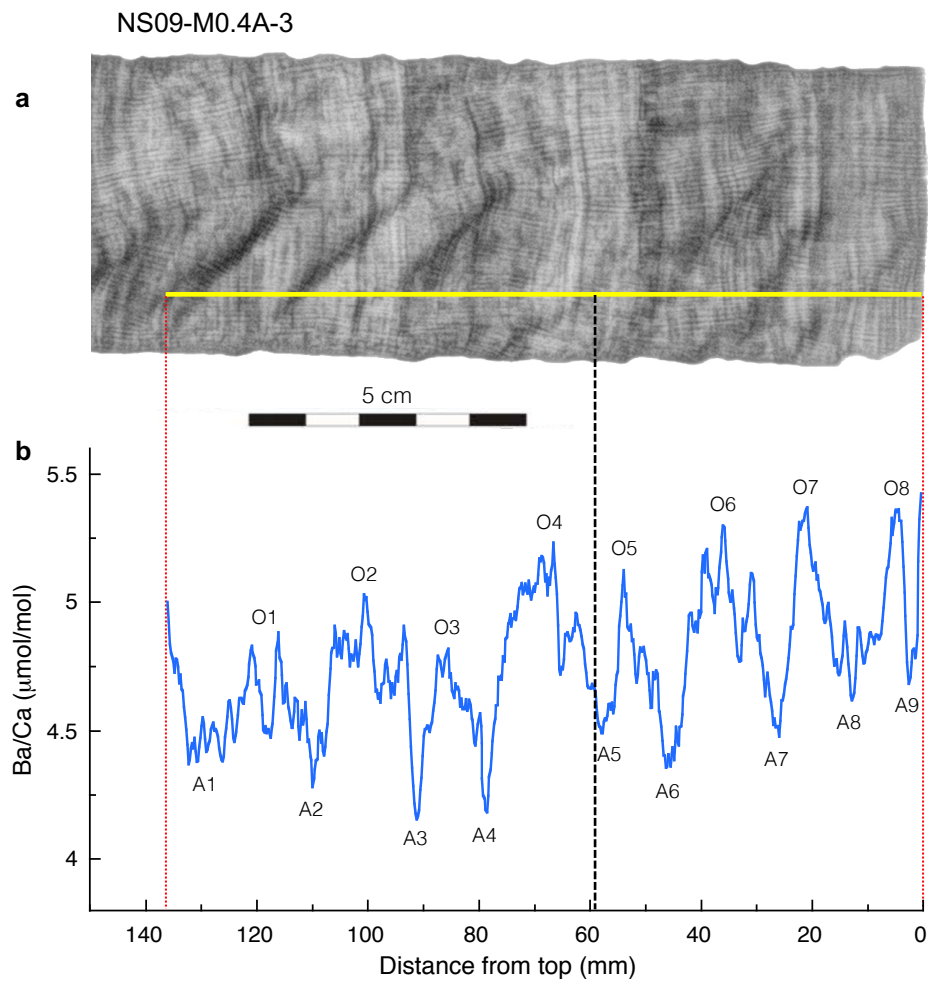

**Figure 5 | X-ray positive image and Ba/Ca age model for coral drill-core NS09-M0.4A-3.** (a) X-ray positive image (darker = higher density) of *Porites* sp. coral M0.4A-3 drilled underwater in the lagoon of the submerged reef at Sarangbaung Island. The coral subsided by 0.4 m during the 28 March 2005 earthquake (Briggs et al. 2006). Yellow line shows the 137-mm length of the LA-ICP-MS sampling track. (b) Seasonal cycles of skeletal Ba/Ca (5-pt running means) used to develop the age model for coral M0.4A-3. The chronology is based on linear interpolation between tie-points assigned to mid-April (low Ba/Ca) and mid-October (high Ba/Ca) (see Methods). Black dashed line marks approximate depth to the March 2005 earthquake.

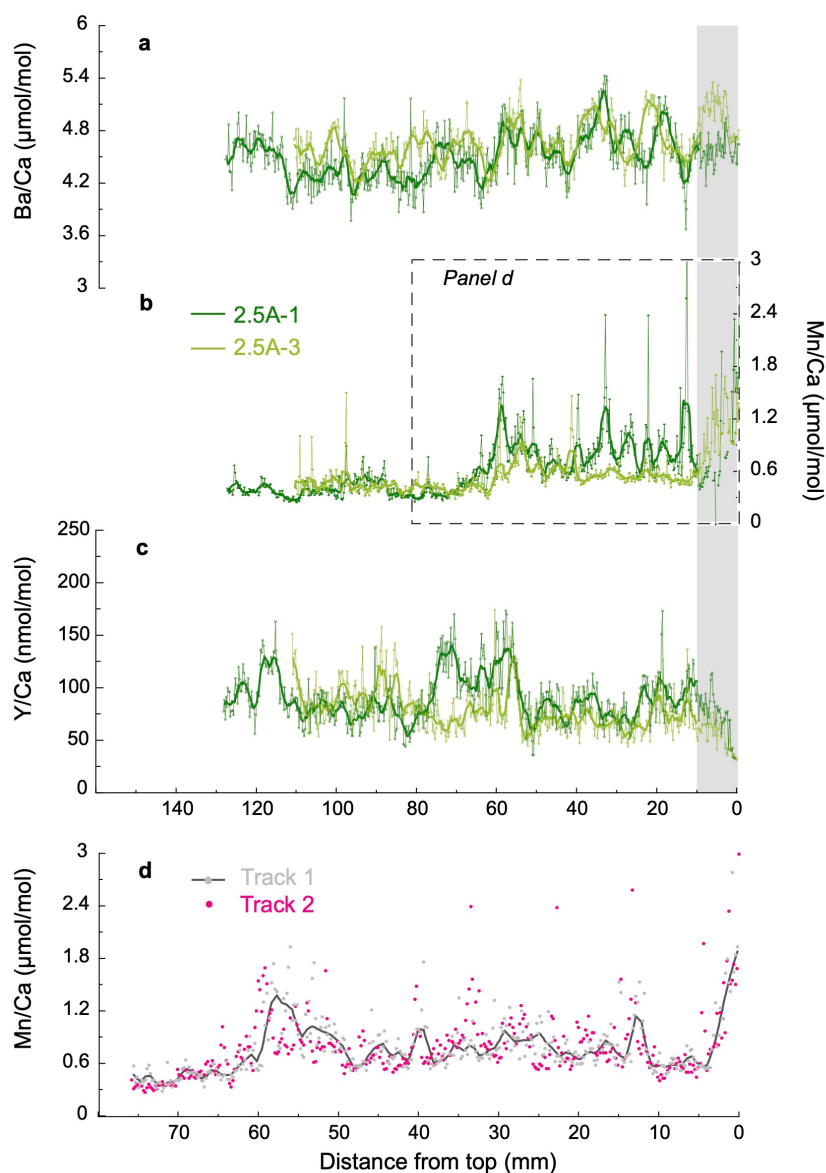

**Figure 6 | LA-ICP-MS Ba/Ca, Mn/Ca and Y/Ca data profiles for drill-cores NS09-2.5A-1 and NS09-2.5A-3. (a-c)** Raw Ba/Ca, Mn/Ca and Y/Ca data (thin lines) and 10-pt running means (thick lines). Grey shading represents the coral tissue layer. **(d)** Replicate analysis of Mn/Ca along two sampling tracks in core 2.5A-1. Mn/Ca data for track 1 were acquired with the major trace element analysis protocol (for Ba, Mn) using a 50 x 500 μm laser spot size. Track 2 Mn/Ca data were acquired with the trace element protocol (for Y) using a 100 x 500 μm laser spot size (following Wyndham et al. 2004). The good replication of the two records shows that the LA-ICP-MS methods are robust and suggests that Mn signals are lattice bound within the coral aragonite.

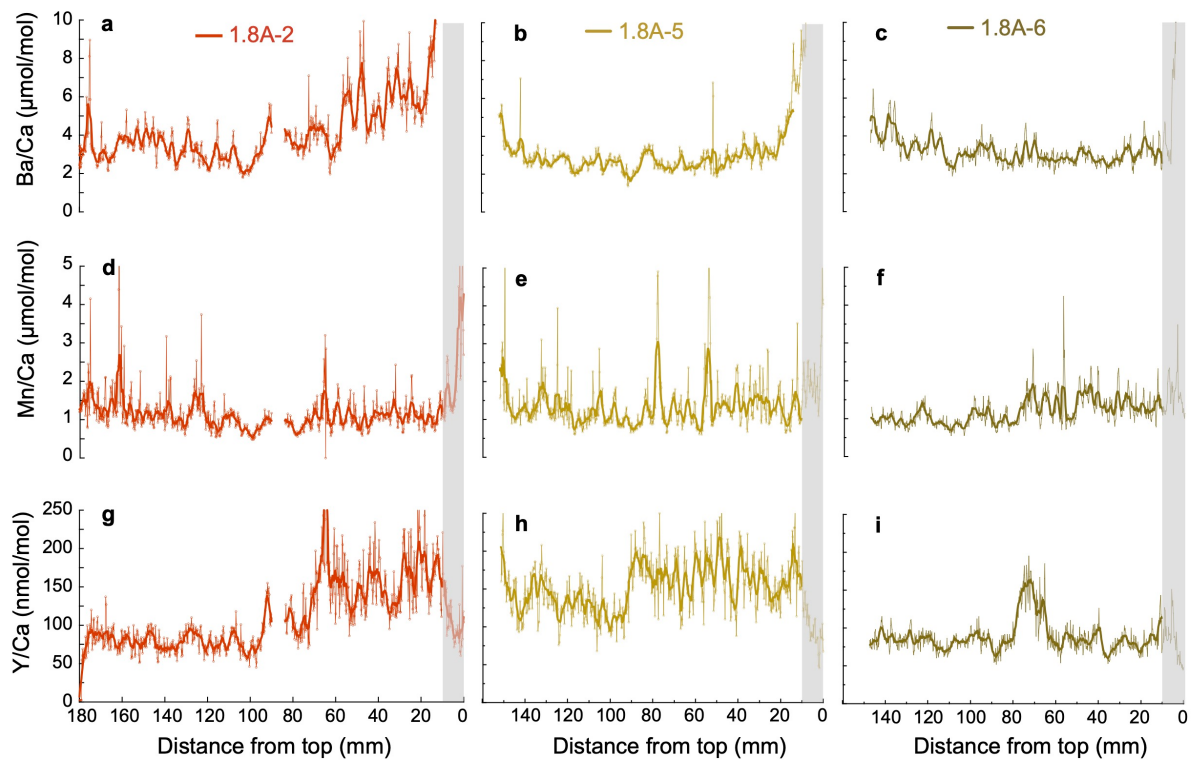

**Figure 7 | LA-ICP-MS Ba/Ca, Mn/Ca and Y/Ca data profiles for drill-cores NS09-1.8A-2, NS09-1.8A-5 and NS09-1.8A-6. (a-c)** Comparison of raw Ba/Ca data (thin lines) and 10-pt running means (thick lines) for the three site 1.8A corals. **(d-f)** As above, but for Mn/Ca. **(g-i)** As above, but for Y/Ca. Grey shading represents the coral tissue layer. The records for coral core 1.8A-2 cover an extended pre-earthquake baseline interval (150–180 mm).

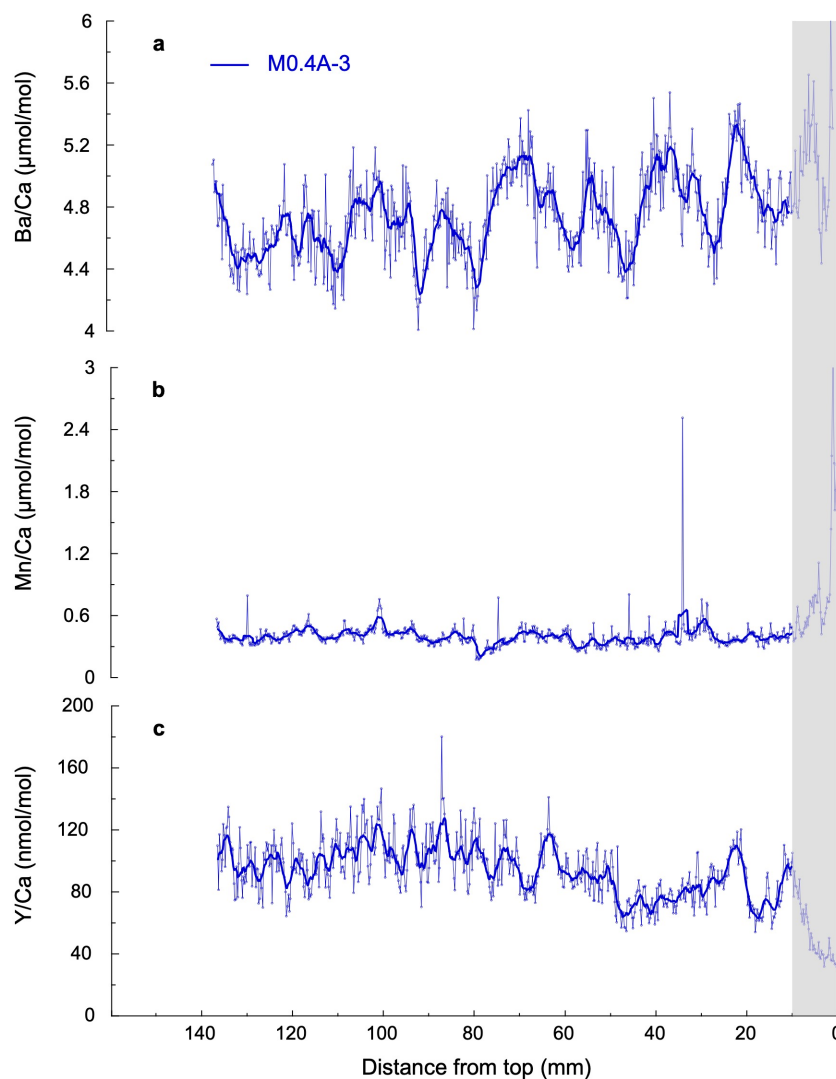

**Figure 8 | LA-ICP-MS Ba/Ca, Mn/Ca and Y/Ca data profiles for drill-core NS09-M0.4A-3. (a-c)** Raw Ba/Ca, Mn/Ca and Y/Ca data (thin lines) and 10-pt running means (thick lines). Grey shading represents the coral tissue layer.

## Supplementary Data

**Table 1.** T-test results for pre- and post-earthquake elemental ratios in the Nias corals. A t-test p-value <0.0001 indicates a significant difference between pre- and post-earthquake mean elemental ratio values. Differences highlighted in blue and orange represent a post-earthquake increase and decrease, respectively. Data within the tissue layer were not included in post-earthquake statistics for Mn/Ca and Ba/Ca.

| Mn/Ca ( $\mu\text{mol/mol}$ ) |             |                |                |              |                 |                 |                   |                |
|-------------------------------|-------------|----------------|----------------|--------------|-----------------|-----------------|-------------------|----------------|
| Coral ID                      | Pre-EQ Mean | Pre-EQ Core SD | Pre-EQ Core SE | Post-EQ Mean | Post-EQ Core SD | Post-EQ Core SE | $\Delta\text{EQ}$ | T-Test p-value |
| 2.5A-1                        | 0.39        | 0.10           | 0.01           | 0.82         | 0.34            | 0.02            | 0.43              | <0.0001        |
| 2.5A-3                        | 0.44        | 0.12           | 0.01           | 0.64         | 0.22            | 0.01            | 0.20              | <0.0001        |
| 1.8A-2                        | 0.98        | 0.37           | 0.02           | 1.15         | 0.39            | 0.02            | 0.17              | <0.0001        |
| 1.8A-5                        | 1.24        | 0.53           | 0.03           | 1.42         | 0.75            | 0.04            | 0.18              | <0.0001        |
| 1.8A-6                        | 0.97        | 0.21           | 0.01           | 1.42         | 0.42            | 0.02            | 0.45              | <0.0001        |
| M0.4A-3                       | 0.40        | 0.08           | 0.00           | 0.41         | 0.17            | 0.01            | 0.01              |                |
| Y/Ca (nmol/mol)               |             |                |                |              |                 |                 |                   |                |
| Coral ID                      | Pre-EQ Mean | Pre-EQ Core SD | Pre-EQ Core SE | Post-EQ Mean | Post-EQ Core SD | Post-EQ Core SE | $\Delta\text{EQ}$ | T-Test p-value |
| 1.8A-2                        | 84.9        | 21.4           | 1.2            | 158.4        | 44.4            | 2.6             | 73.5              | <0.0001        |
| 1.8A-5                        | 139.2       | 32.0           | 1.8            | 163.8        | 32.4            | 1.8             | 24.6              | <0.0001        |
| M0.4A-3                       | 102.1       | 16.7           | 0.9            | 81           | 15.1            | 0.9             | -21.1             | <0.0001        |
| Ba/Ca ( $\mu\text{mol/mol}$ ) |             |                |                |              |                 |                 |                   |                |
| Coral ID                      | Pre-EQ Mean | Pre-EQ Core SD | Pre-EQ Core SE | Post-EQ Mean | Post-EQ Core SD | Post-EQ Core SE | $\Delta\text{EQ}$ | T-Test p-value |
| 2.5A-1                        | 4.39        | 0.25           | 0.02           | 4.63         | 0.29            | 0.02            | 0.24              | <0.0001        |
| 2.5A-3                        | 4.56        | 0.20           | 0.01           | 4.74         | 0.28            | 0.02            | 0.18              | <0.0001        |
| 1.8A-2                        | 3.2         | 0.8            | 0.04           | 6.5          | 2.5             | 0.17            | 3.35              | <0.0001        |
| 1.8A-5                        | 2.76        | 0.67           | 0.04           | 2.89         | 0.67            | 0.04            | 0.13              |                |
| 1.8A-6                        | 3.39        | 0.78           | 0.04           | 2.98         | 0.51            | 0.03            | -0.41             | <0.0001        |
| M0.4A-3                       | 4.67        | 0.26           | 0.01           | 4.85         | 0.28            | 0.02            | 0.18              | <0.0001        |

### Supplementary References

- Briggs, R. W. *et al.* Deformation and slip along the Sunda megathrust in the great 2005 Nias-Simeulue earthquake. *Science* **311**, 1897–1901 (2006).
- Gagan, M. K. *et al.* Coral  $^{13}\text{C}/^{12}\text{C}$  records of vertical seafloor displacement during megathrust earthquakes west of Sumatra. *Earth Planet. Sci. Lett.* **432**, 461–471 (2015).
- Wyndham, T., McCulloch, M. T., Fallon, S. J. & Alibert, C. High-resolution coral records of rare earth elements in coastal seawater: biogeochemical cycling and a new environmental proxy. *Geochim. Cosmochim. Acta* **68**, 2067–2080 (2004).
